# Supplementary material for: Identification of candidate genes conferring tolerance to aluminum stress in Pinus massoniana inoculated with ectomycorrhizal fungus
Source: PubMed Central journal article supplement (PMC7667757; doi:10.1186/s12870-020-02719-3), 2020-11-16

## Supplementary files

**Figure S1.** GO enrichment analysis. SL0, CK0 and CK04 represent the *Suillus luteus* (SL) inoculated plants without Aluminum stress application, SL inoculated plants with 0.4 mmol L<sup>-1</sup> Aluminum stress application, plants non inoculated without Aluminum stress application and plants non inoculated with 0.4 mmol L<sup>-1</sup> Aluminum stress application, respectively.

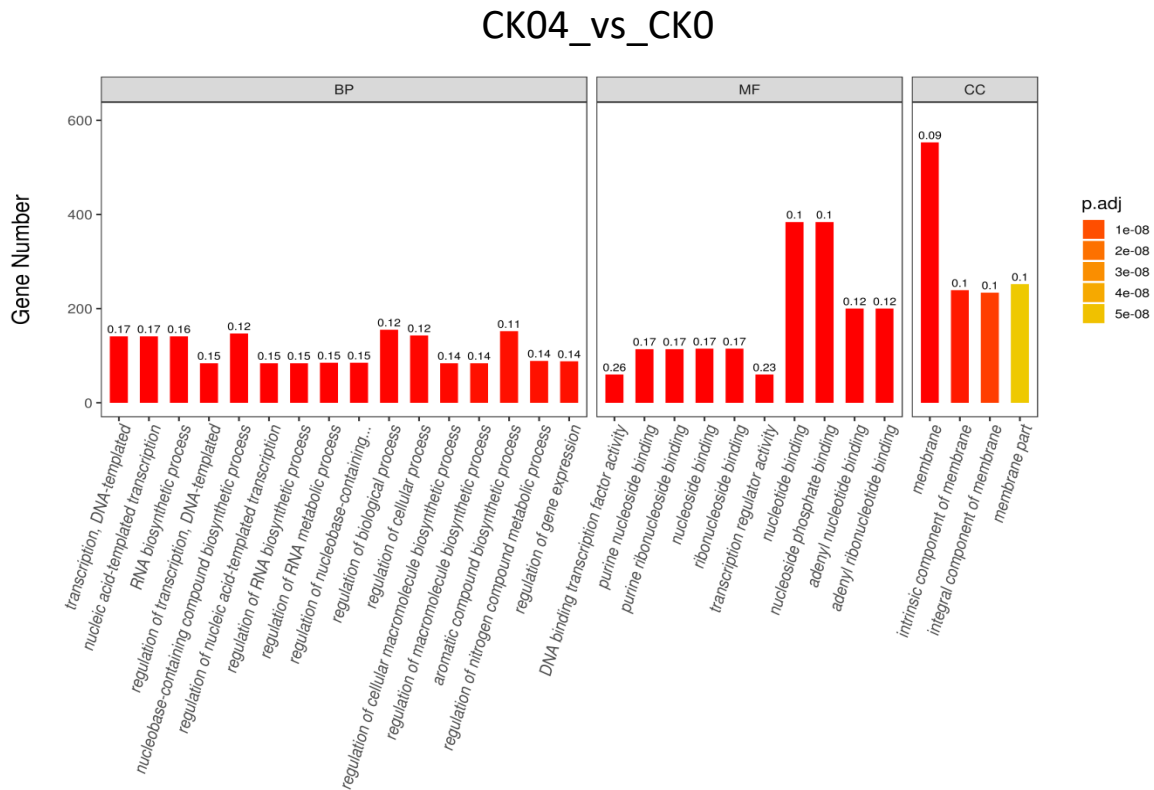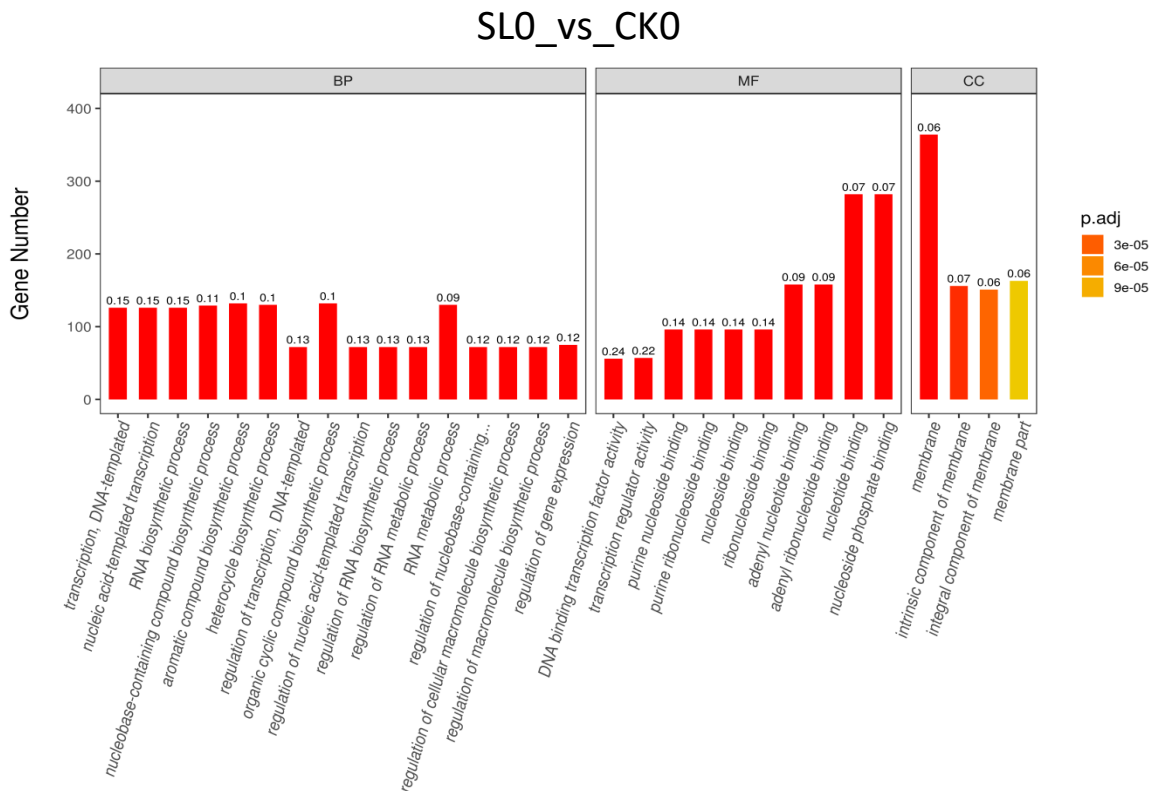

Enriched GO Terms (Top 30)

# SL04\_vs\_CK04

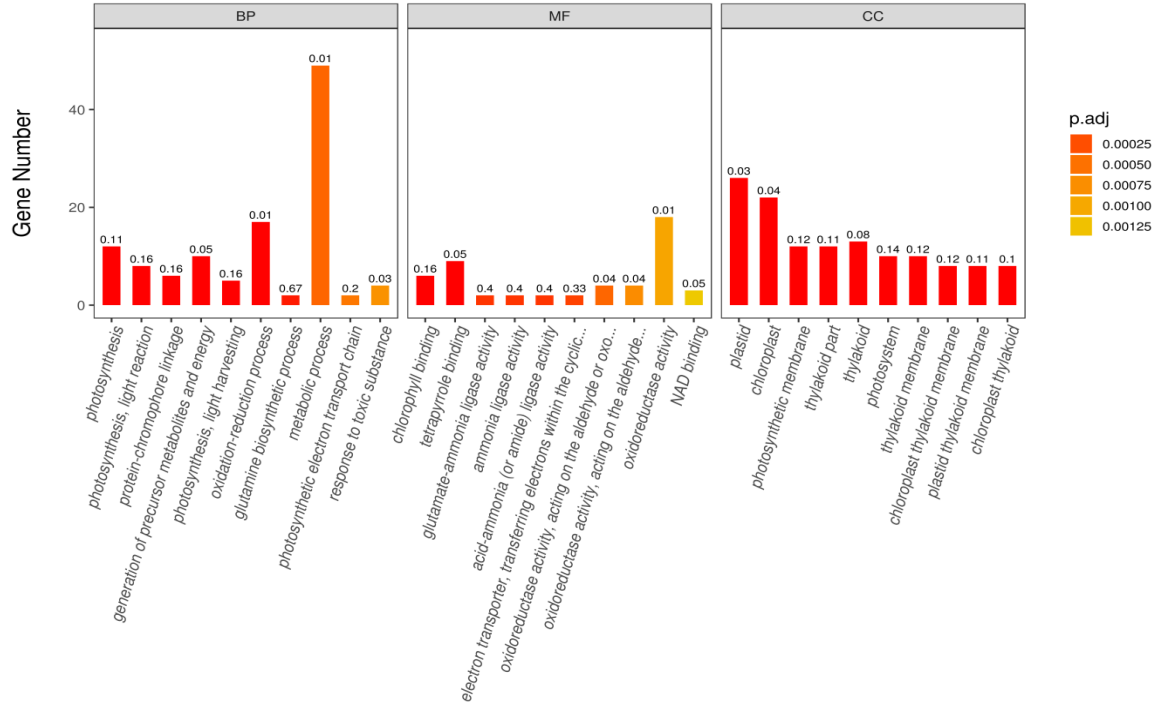

**Figure S2.** KEGG enrichment analysis. SL0, CK0 and CK04 represent the *Suillus luteus* (SL) inoculated plants without Aluminum stress application, plants non inoculated without Aluminum stress application and plants non inoculated with 0.4 mmol L<sup>-1</sup> Aluminum stress application, respectively.

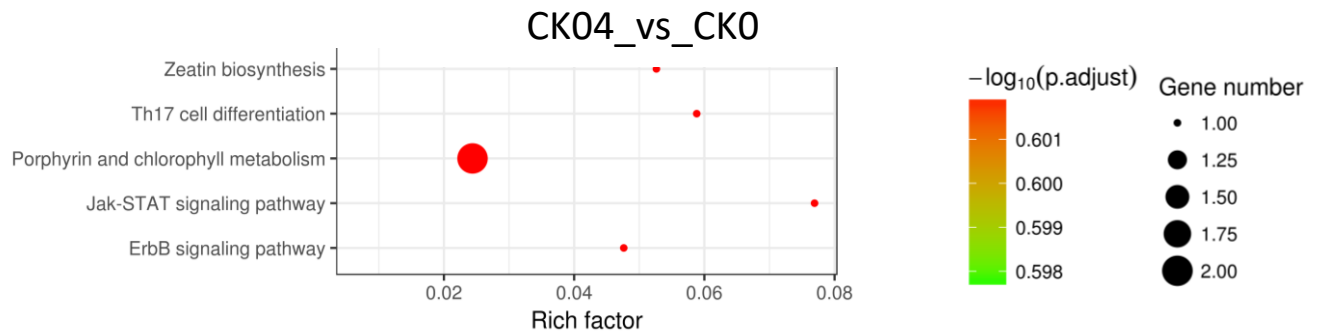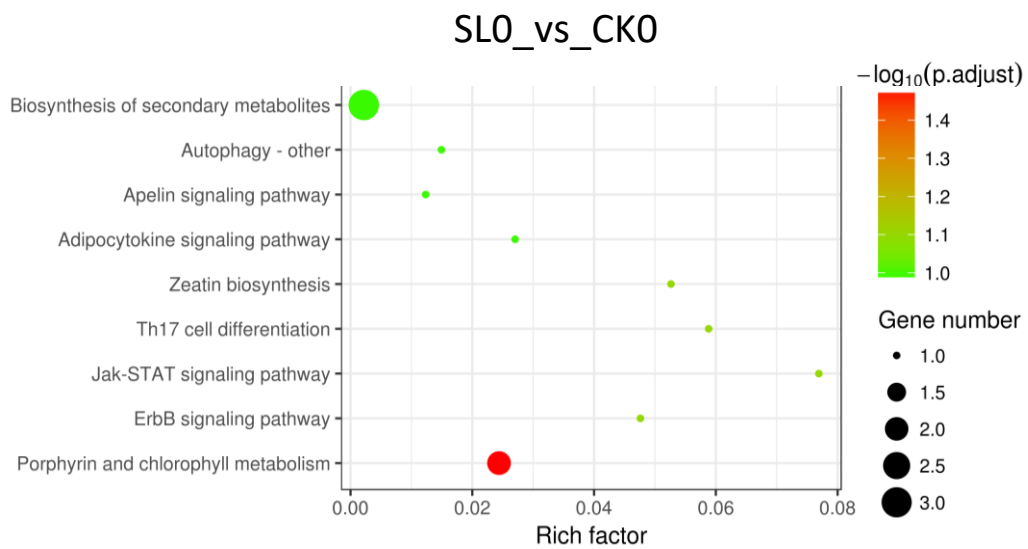

Supplement: 12870_2020_2719_MOESM2_ESM.pdf [file 12870_2020_2719_MOESM2_ESM.pdf]
